# Supplementary material for: Highly dispersed Co-based Fischer–Tropsch synthesis catalysts from metal–organic frameworks
Source: Royal Society of Chemistry journal article supplement (doi:10.1039/c7ta02128c), 2017-01-01
Supplement: c7ta02128c1.pdf [file c7ta02128c1.pdf]

## Supporting information

### Highly Dispersed Co-based Fischer-Tropsch Synthesis Catalysts from Metal-Organic Frameworks

*Bin Qiu<sup>a</sup>, Ce Yang<sup>b</sup>, Wenhan Guo<sup>a</sup>, Yao Xu<sup>b</sup>, Zibin Liang<sup>a</sup>, Ding Ma<sup>b,\*</sup> and Ruqiang  
Zou<sup>a,\*</sup>*

B. Qiu, W. Guo, Prof. R. Zou

[a] Beijing Key Laboratory for Theory and Technology of Advanced Battery Materials,  
Department of Materials Science and Engineering, College of Engineering, Peking  
University, Beijing 100871, P. R. China

E-mail: [rzou@pku.edu.cn](mailto:rzou@pku.edu.cn)

[b] Beijing National Laboratory for Molecular Sciences, College of Chemistry and  
Molecular Engineering, Peking University, Beijing 100871, P. R. China

Email: [dma@pku.edu.cn](mailto:dma@pku.edu.cn).

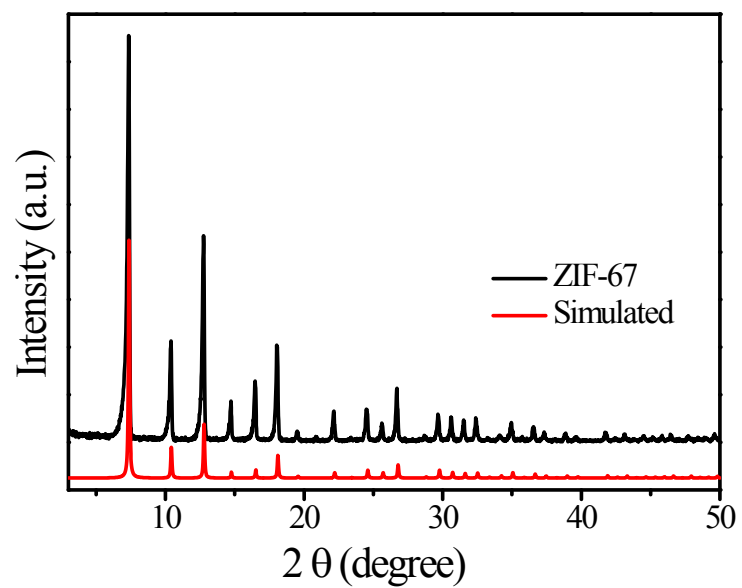

Fig. S1. PXRD pattern of ZIF-67

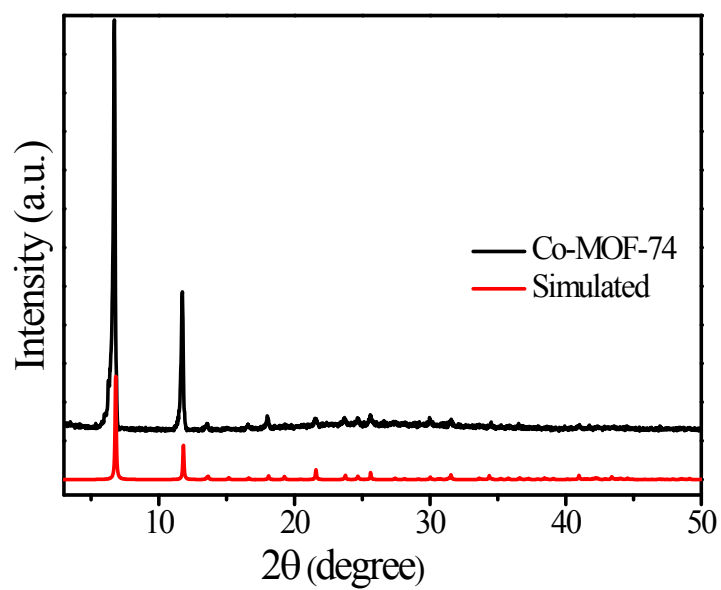

Fig. S2. PXRD pattern of Co-MOF-74

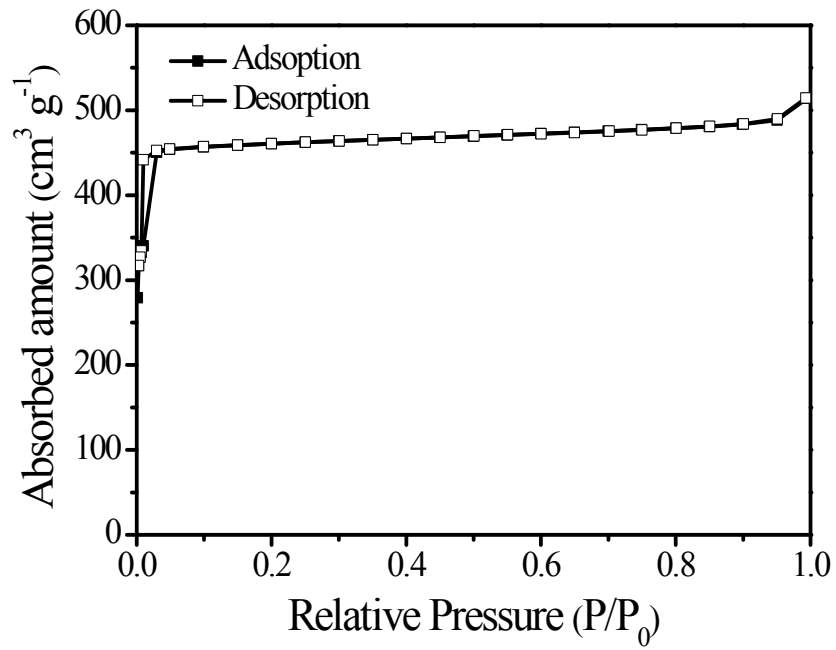

Fig. S3.  $\text{N}_2$  adsorption-desorption isotherms of ZIF-67

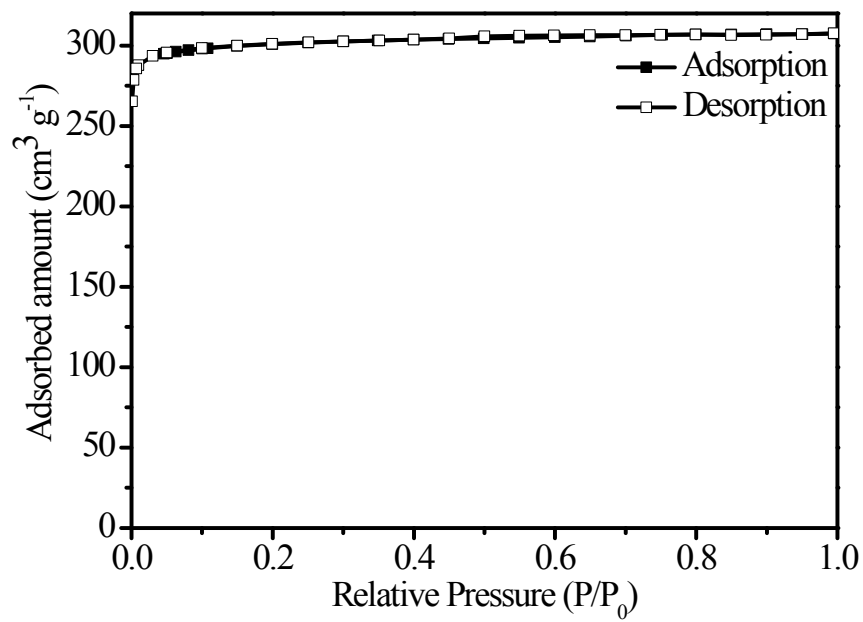

Fig. S4.  $\text{N}_2$  adsorption-desorption isotherms of Co-MOF-74

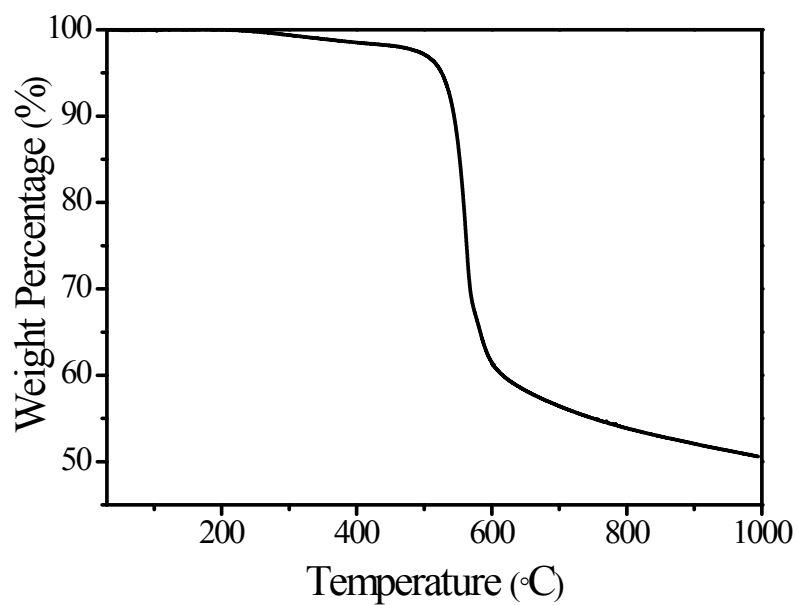

Fig. S5. Thermogravimetric analysis of ZIF-67 under N<sub>2</sub>

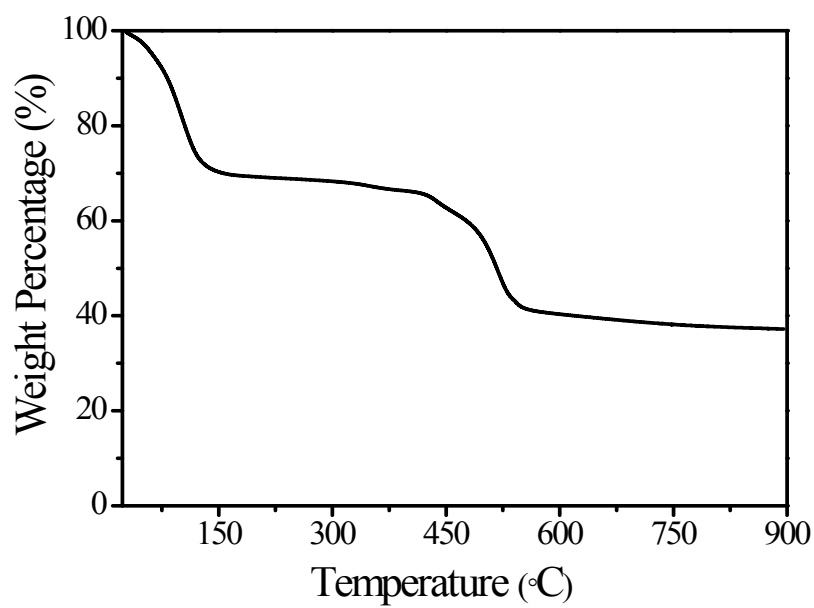

Fig. S6. Thermogravimetric analysis of Co-MOF-74 under N<sub>2</sub>

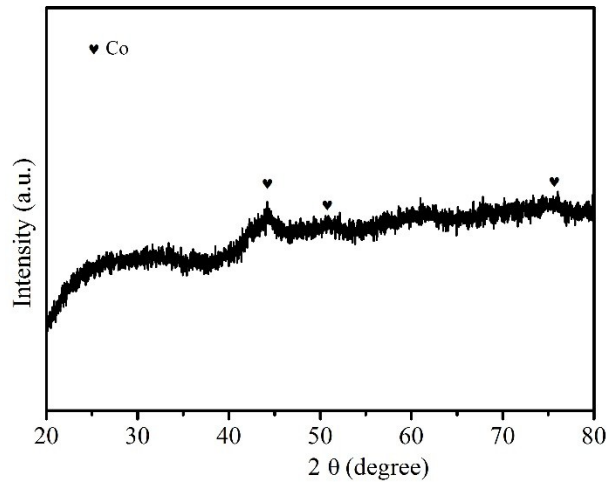

Fig. S7. PXRD patterns of Co@C-550 composites after 100 h test

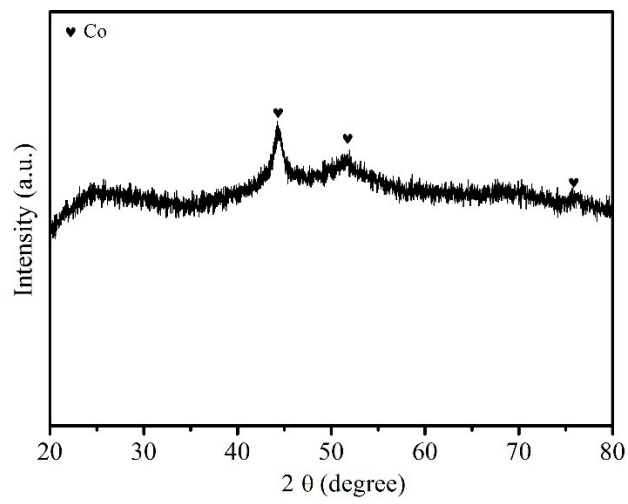

Fig. S8. PXRD patterns of Co@NC-550 composites after 100 h test

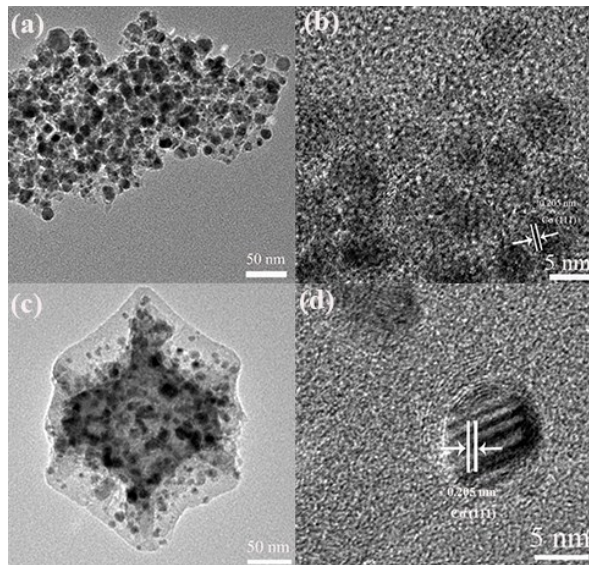

Fig. S9. (a) TEM images of Co@C-550 composites after 100 h test, (b) HRTEM images of Co@C-550 composites after 100 h test, (c) TEM images of Co@NC-550 composites after 100 h test and (d) HRTEM images of Co@NC-550 composites after 100 h test

Table S1. Fitting parameter for Co@NC-550 and Co@C-550 catalysts

| Sample    | Scattering | CN   | DW    | $\Delta E_0$ (eV) | R (Å) |
|-----------|------------|------|-------|-------------------|-------|
| Co@NC-550 | Co-N       | 2.48 | 9.03  | -3.78             | 2.01  |
|           | Co-Co      | 5.00 | 7.25  | -3.78             | 2.49  |
| Co@C-550  | Co-C       | 4.72 | 14.72 | -3.00             | 2.11  |
|           | Co-Co      | 6.51 | 8.00  | -3.00             | 2.50  |

Table S2. The contents of Co elements in pure MOFs and MOFs derived

nanomaterials are measured by ICP-OES

|           | Co (wt %) |
|-----------|-----------|
| Co-MOF-74 | 19        |
| Co@C-550  | 52        |
| ZIF-67    | 25        |
| Co@NC-550 | 30        |

Table S3. Comparison of the FTS catalytic activities of Co@C-550 and Co@NC-550

with the reported MOF-derived catalysts.

| Catalyst                                            | T<br>(°C) | P<br>(MPa) | GHSV                                      | CO<br>conversion<br>(%) | CH <sub>4</sub> | C <sub>2</sub> -C <sub>4</sub> | C <sub>5</sub> <sup>+</sup> | Ref          |
|-----------------------------------------------------|-----------|------------|-------------------------------------------|-------------------------|-----------------|--------------------------------|-----------------------------|--------------|
| Fe-BTC derived<br>Fe@C                              | 340       | 2          | 30000 h <sup>-1</sup>                     | 72                      | 14.6            | 29 <sup>a</sup>                | NA                          | 11           |
| Fe-BTC derived<br>Fe@C                              | 340       | 2          | 30000 h <sup>-1</sup>                     | 53                      | 13              | 47 <sup>a</sup>                | NA                          | 12           |
| Fe-MIL-88B<br>derived<br>composites                 | 300       | 2          | 36000 h <sup>-1</sup>                     | 33.8                    | 11.5            | 25.1                           | 63.4                        | 13           |
| Fe-MIL-88B-NH <sub>2</sub><br>derived<br>composites | 270       | 2          | 36000 h <sup>-1</sup>                     | 13.1                    | 13.1            | 33.5                           | 53.4                        |              |
| Co@MIL-53(Al)                                       | 240       | 2          | 0.64 L gcat <sup>-1</sup> h <sup>-1</sup> | 23.8                    | 13.3            | 13.5                           | 67.7                        | 32           |
| ZIF-67 derived<br>Co@NC                             | 230       | 3          | 24 L gcat <sup>-1</sup> h <sup>-1</sup>   | 10                      | 22              | 37                             | 31                          | This<br>work |
| Co-MOF-74<br>derived Co@C                           | 230       | 3          | 24 L gcat <sup>-1</sup> h <sup>-1</sup>   | 30                      | 18              | 10                             | 65                          | This<br>work |

a: C<sub>2</sub>-C<sub>5</sub>

NA: Not Available
